# Supplementary material
Source: publisher figshare collection journal article supplement (https://sage.figshare.com/ndownloader/files/17448206)

# Synthesis and cytotoxic activity of 7, 4'-*O*-modified genistein amino acid derivatives

Yao-Fu Zeng<sup>1,2</sup>, Yu-Qin Duan<sup>2</sup>, Lanqing Liao<sup>1</sup>, Xiaokang Long<sup>1</sup>, Cheng Gao<sup>2</sup>,

Xianghao Wen<sup>3\*</sup>

<sup>1</sup> Institute of Pharmacy and Pharmacology, University of South China, Hengyang, 421001, P. R. of China

<sup>2</sup> Hunan Province Cooperative Innovation Center for Molecular Target New Drug Study, University of South China, Hengyang, 421001, P. R. of China

<sup>3</sup> Nanhua Affiliated Hospital of University of South China, Hengyang, 421001, P. R. of China

## Supporting Information

### NMR Spectrum of the synthesized compounds

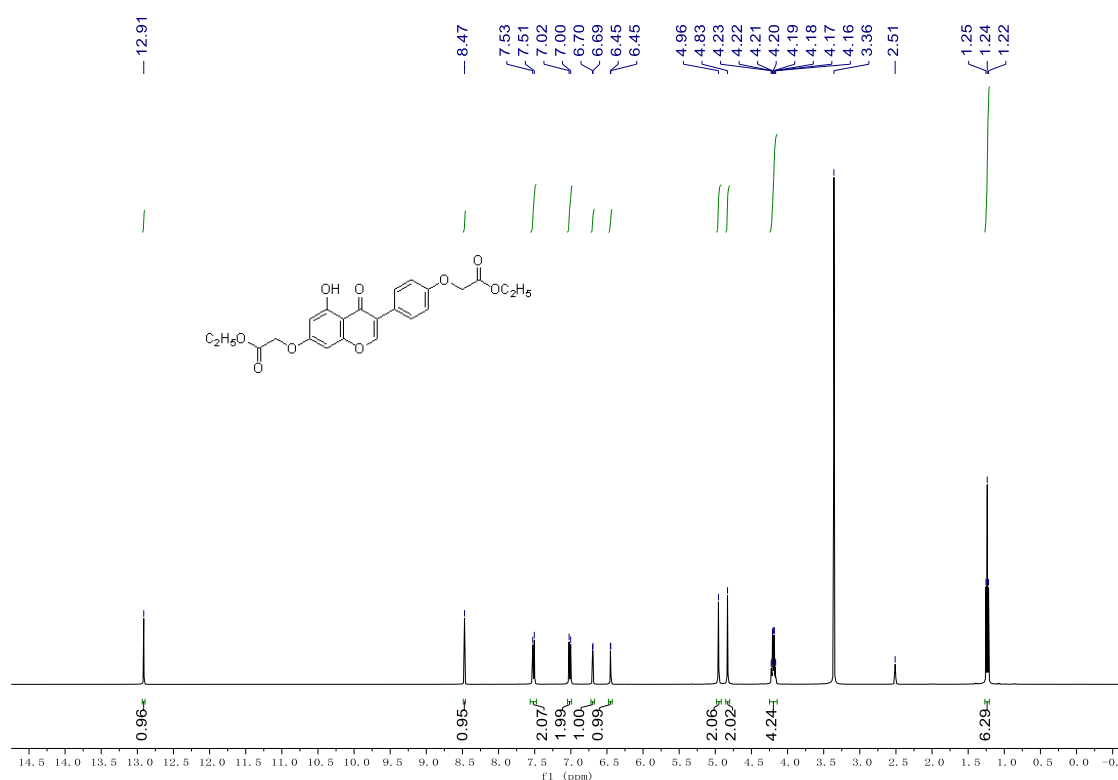

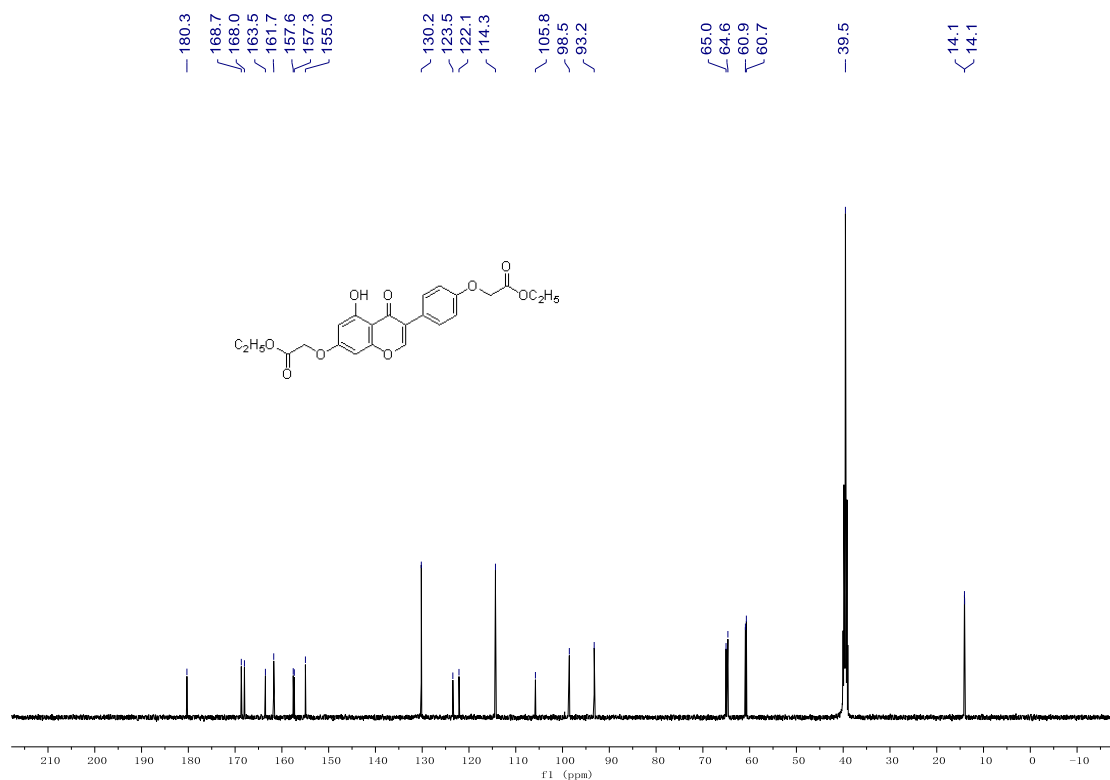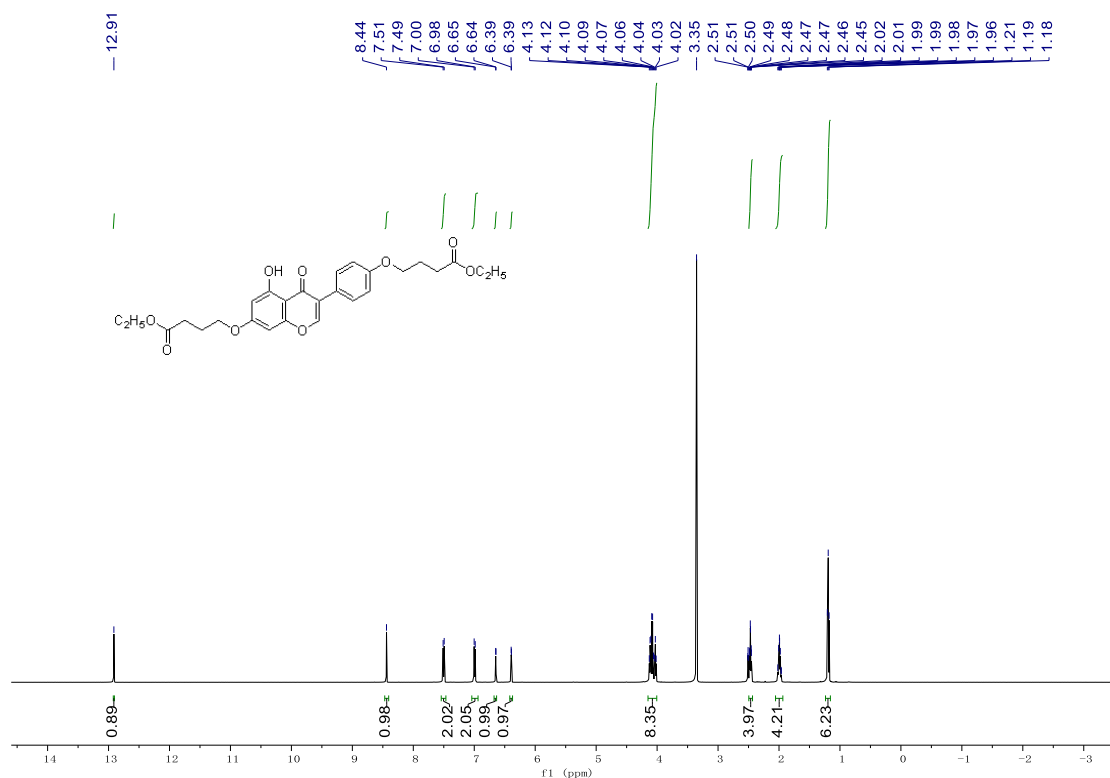

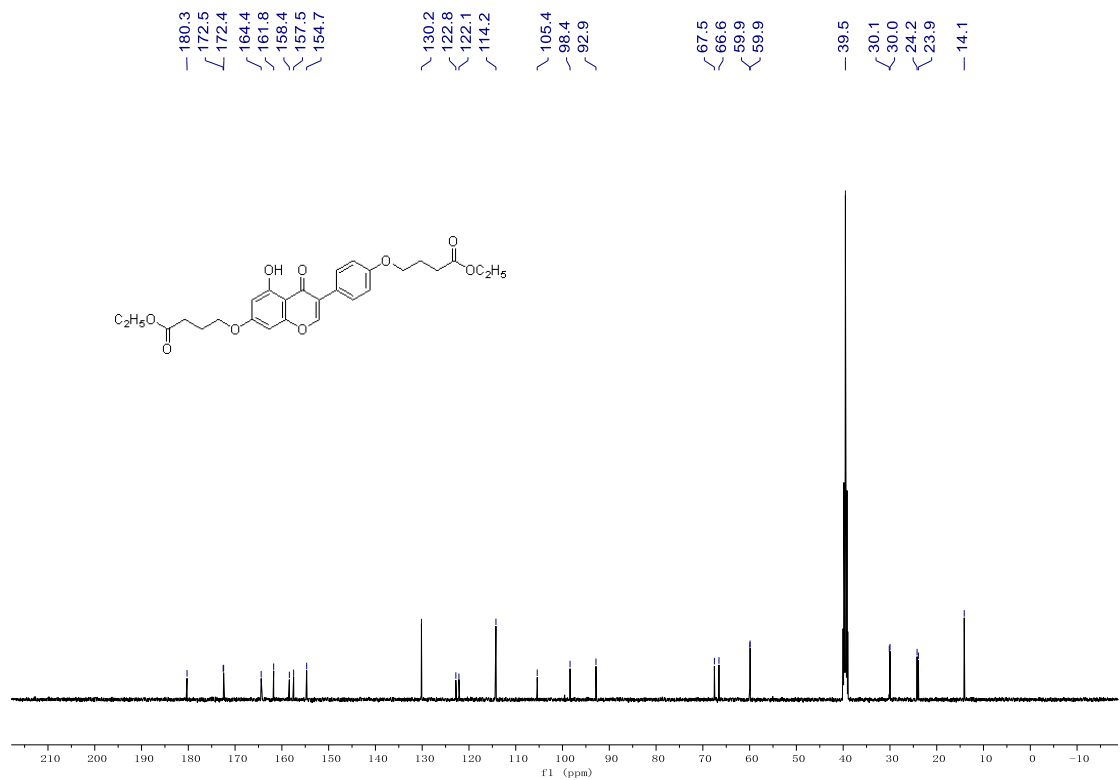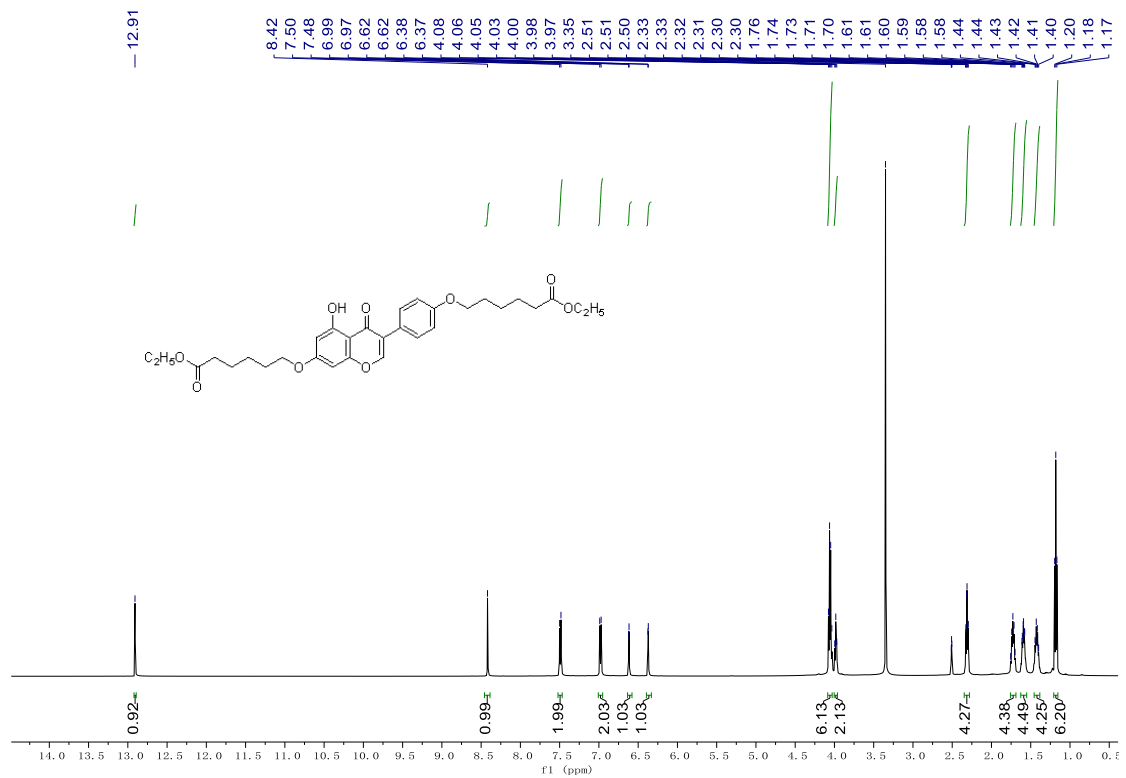

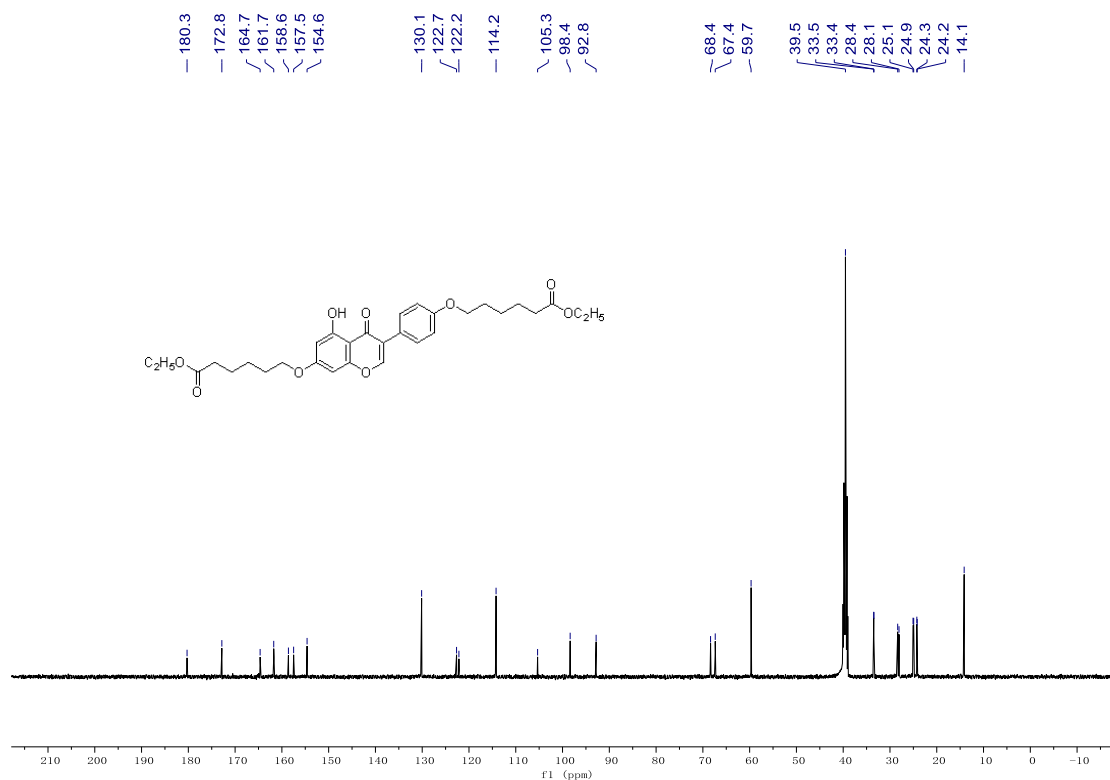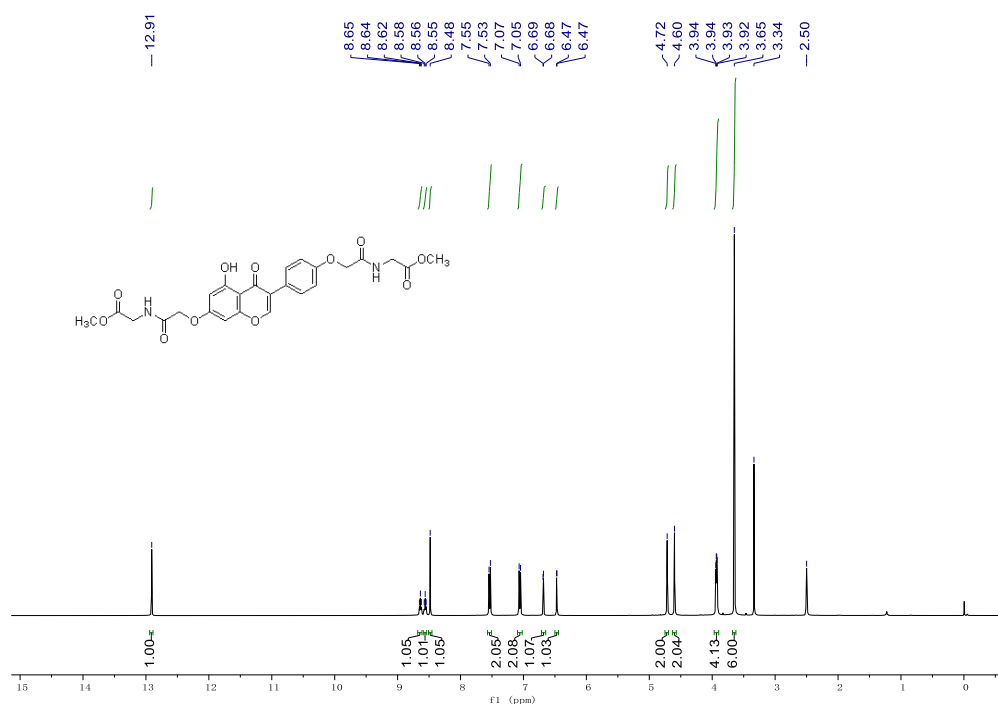

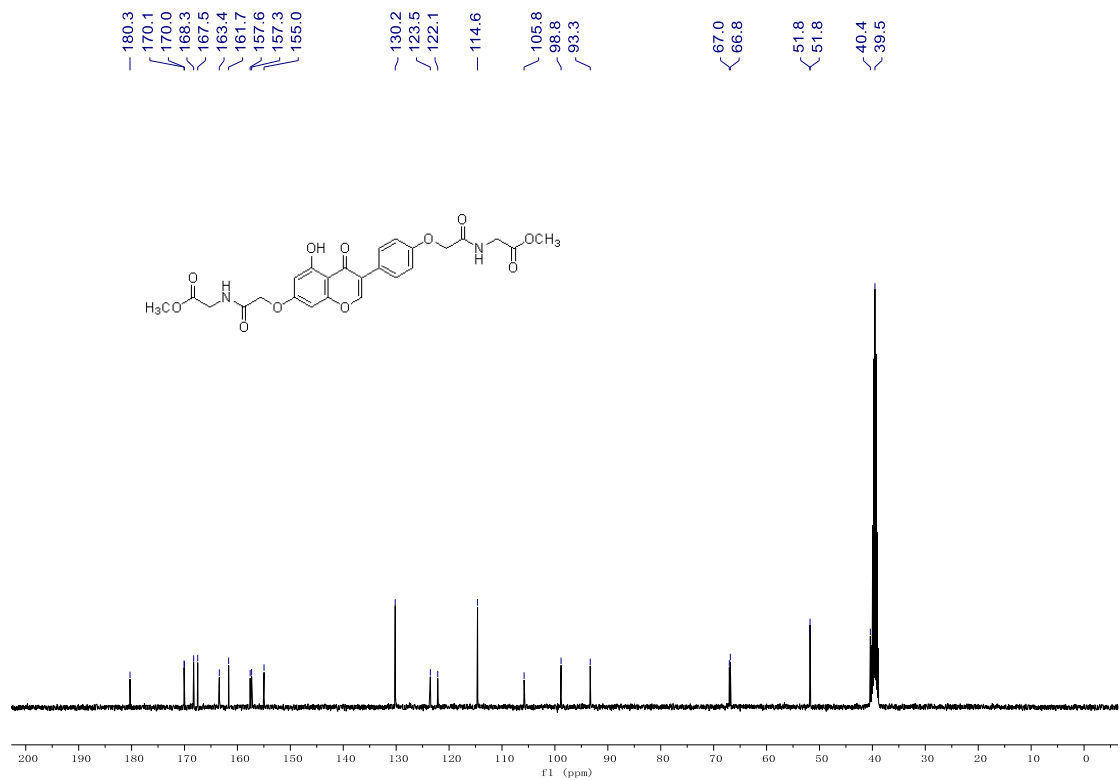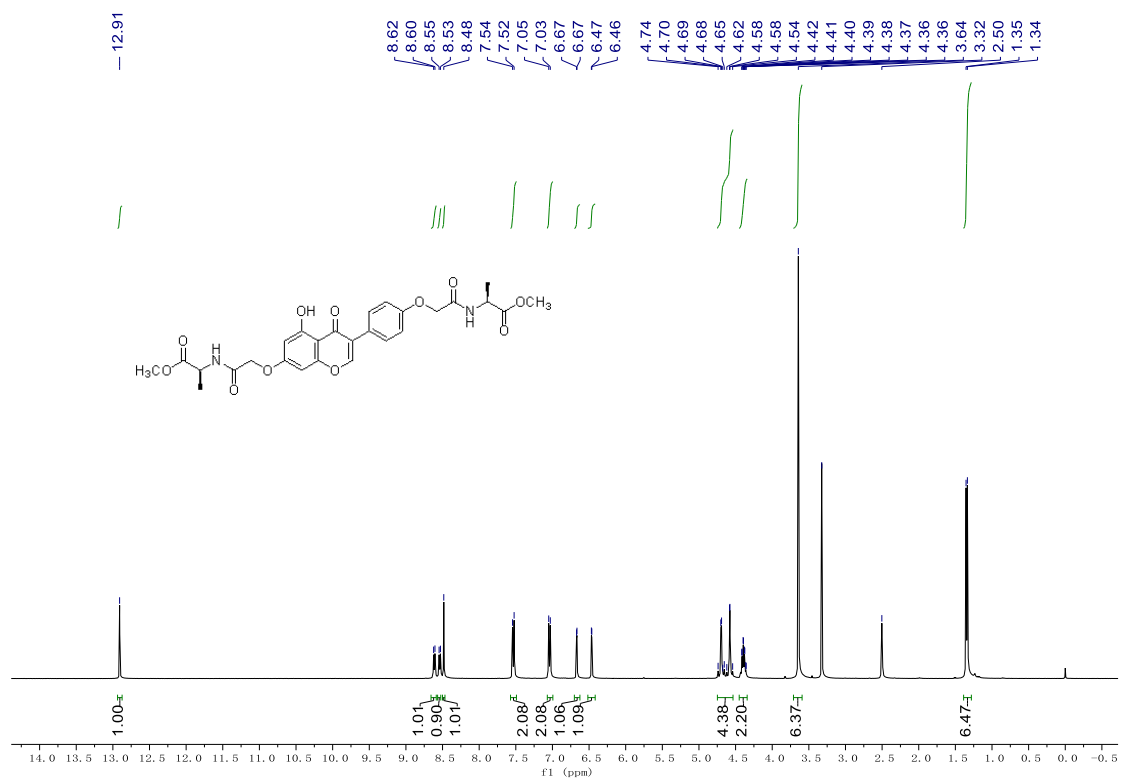

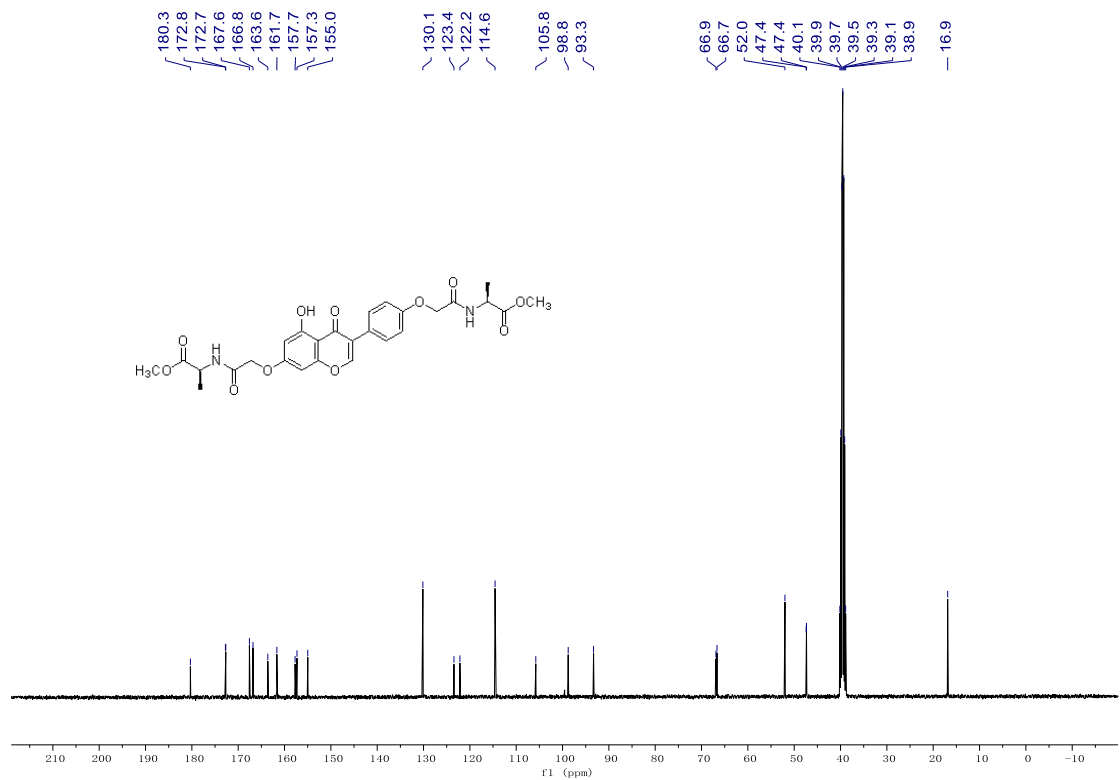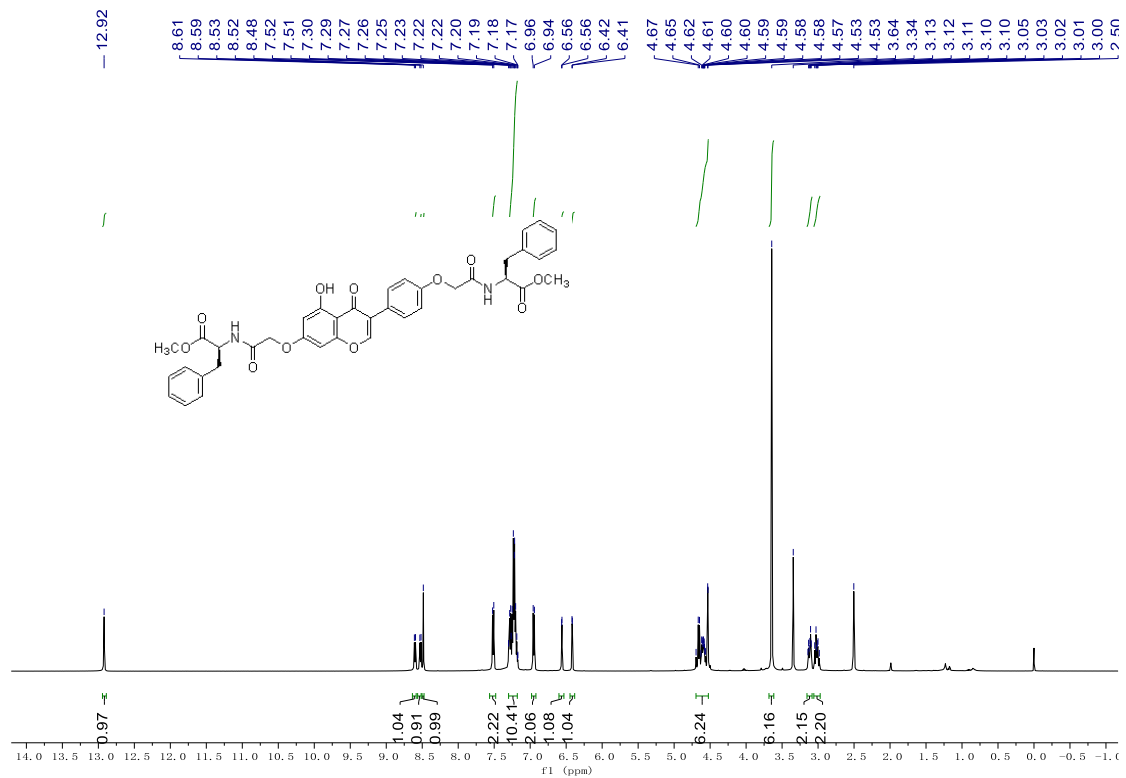

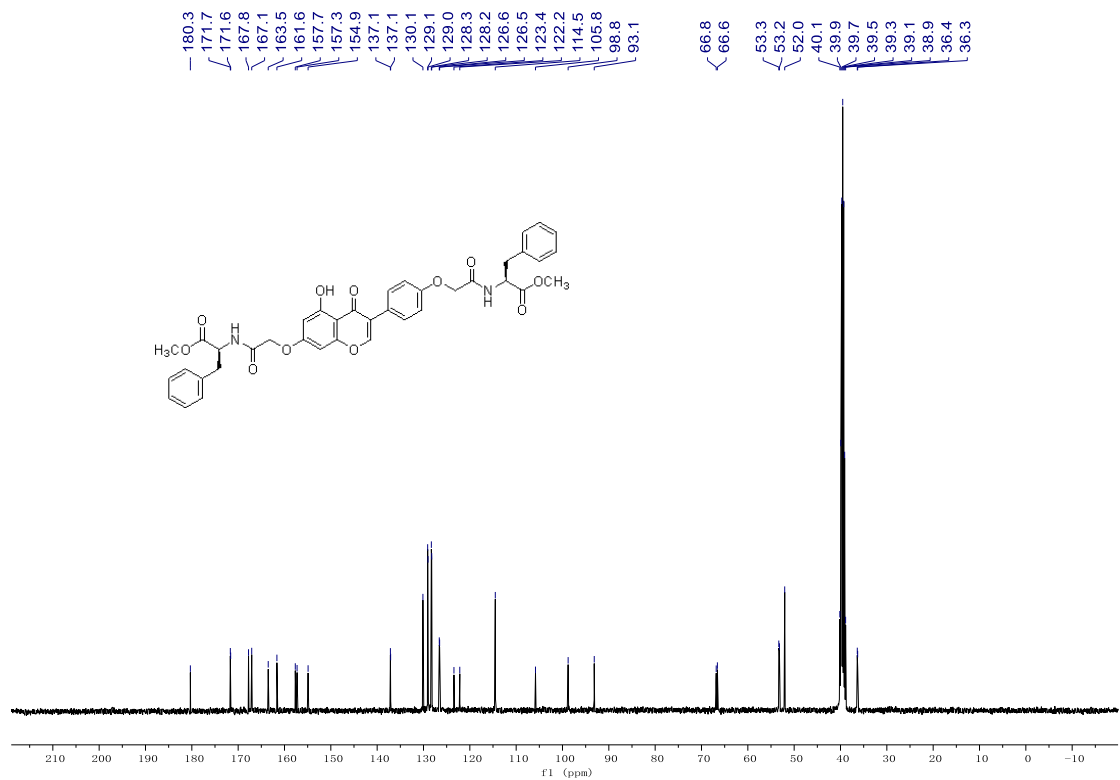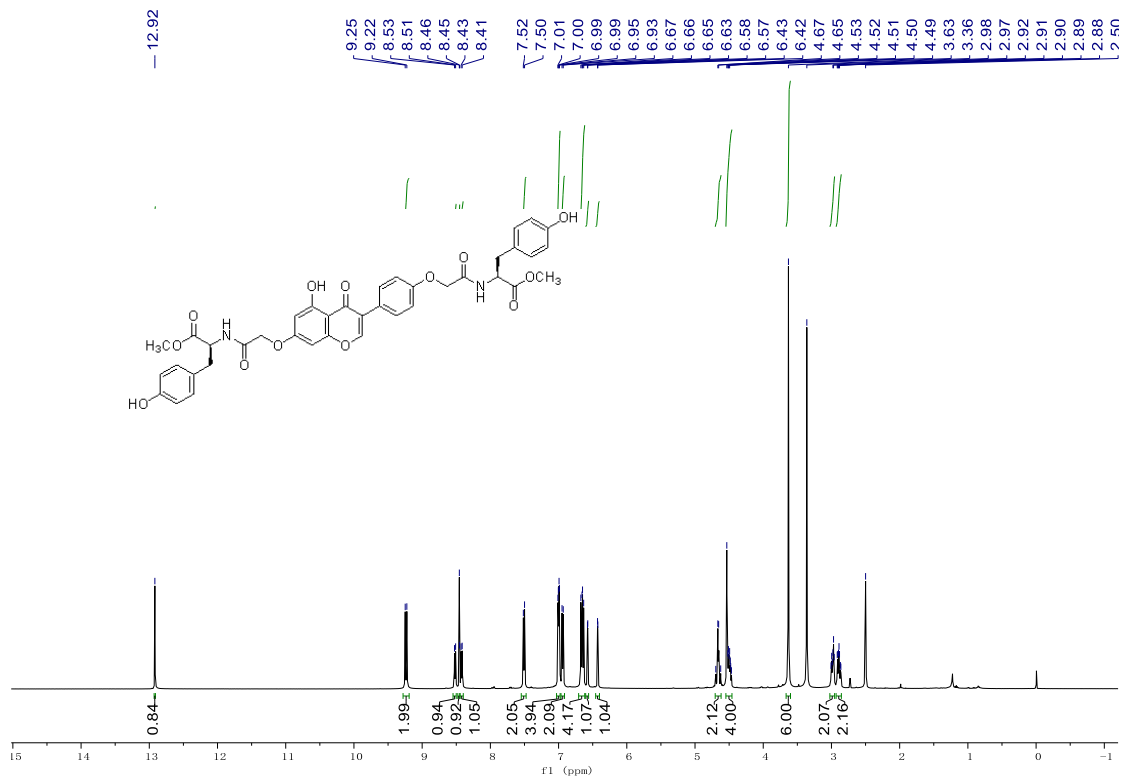

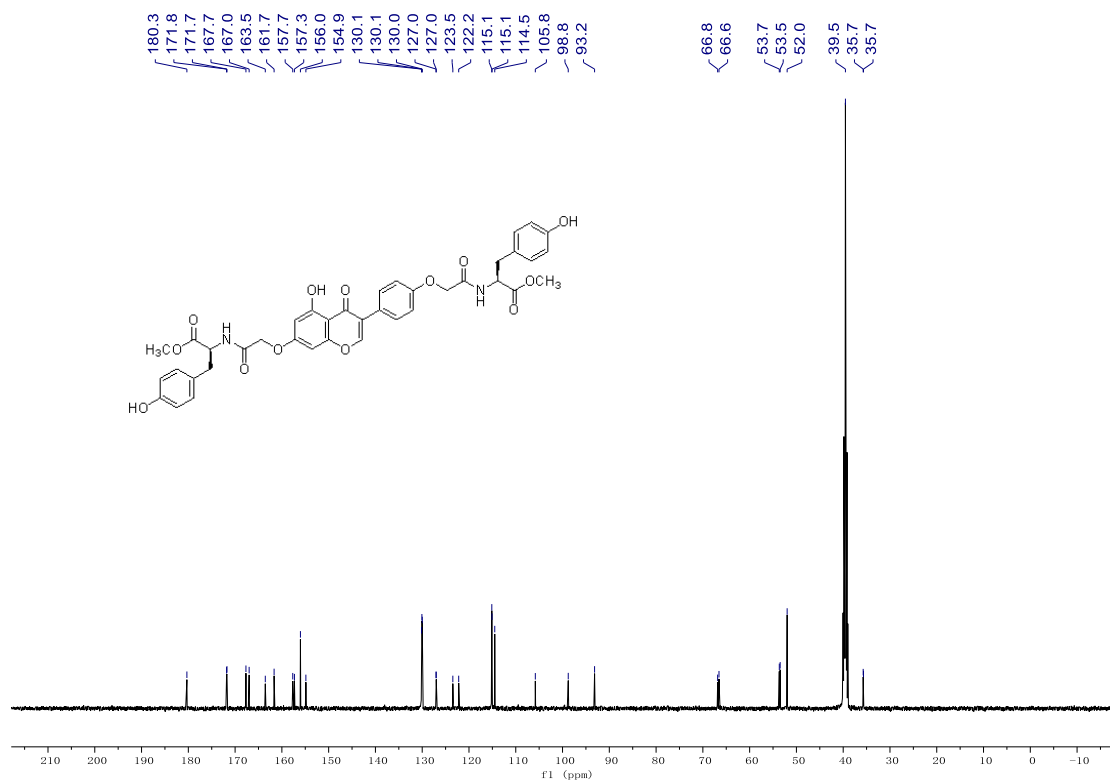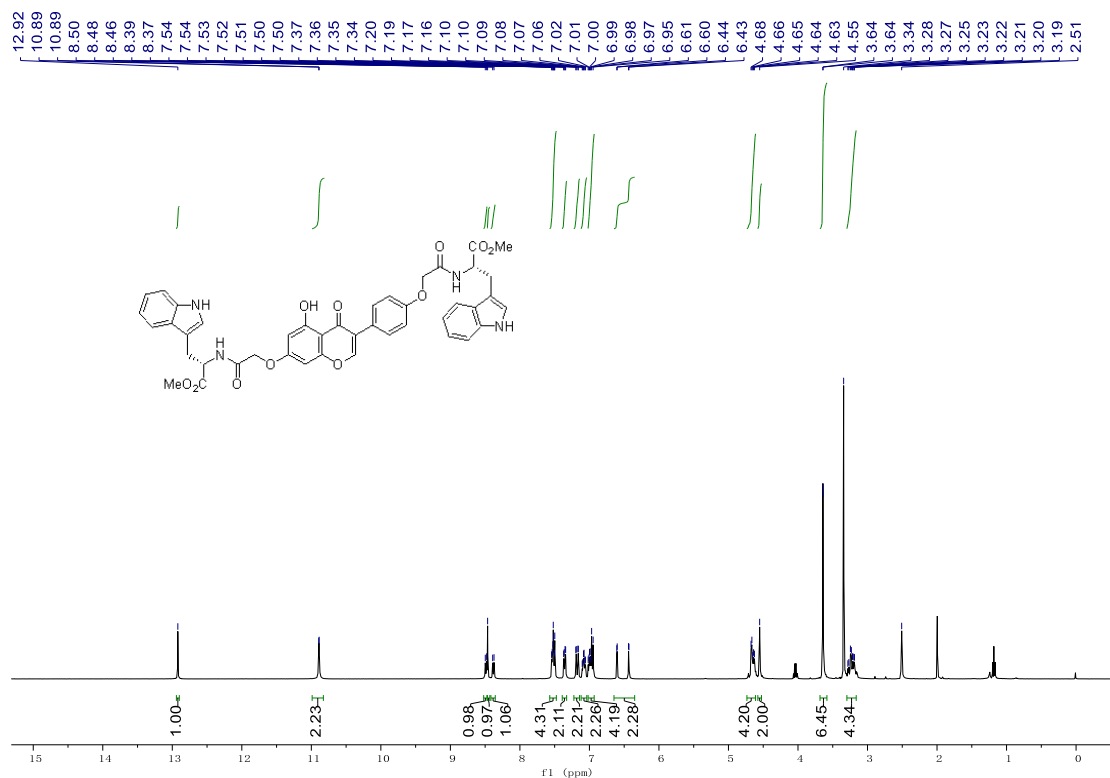



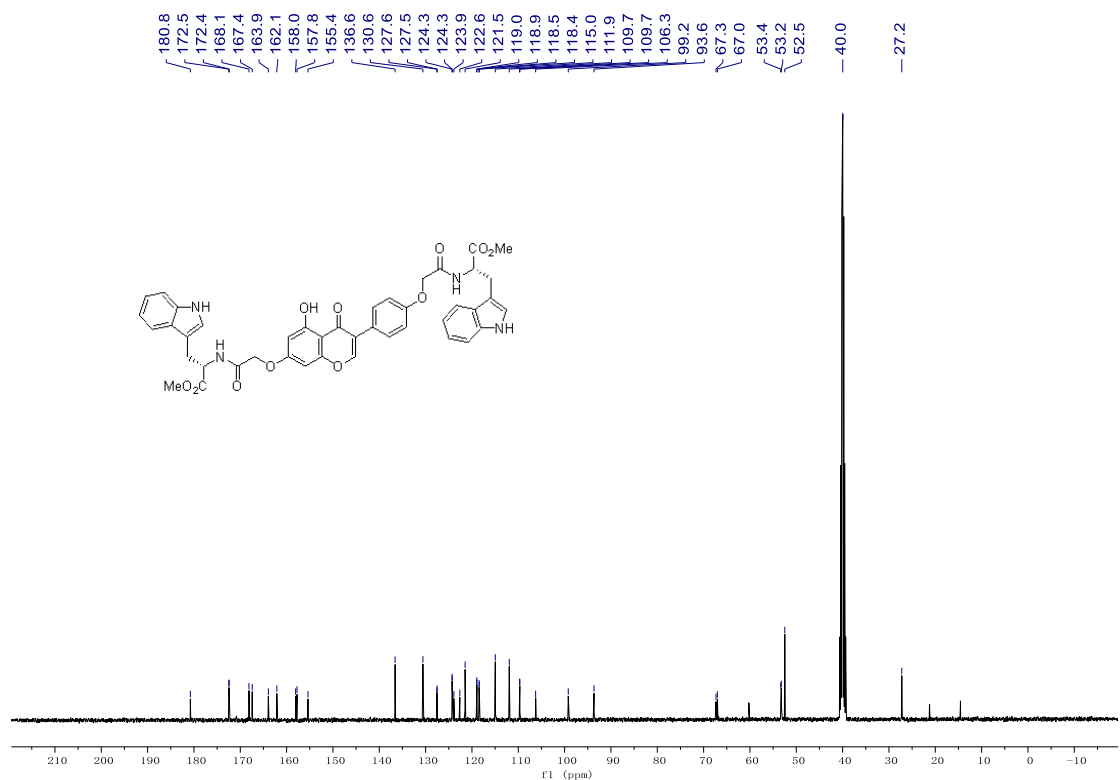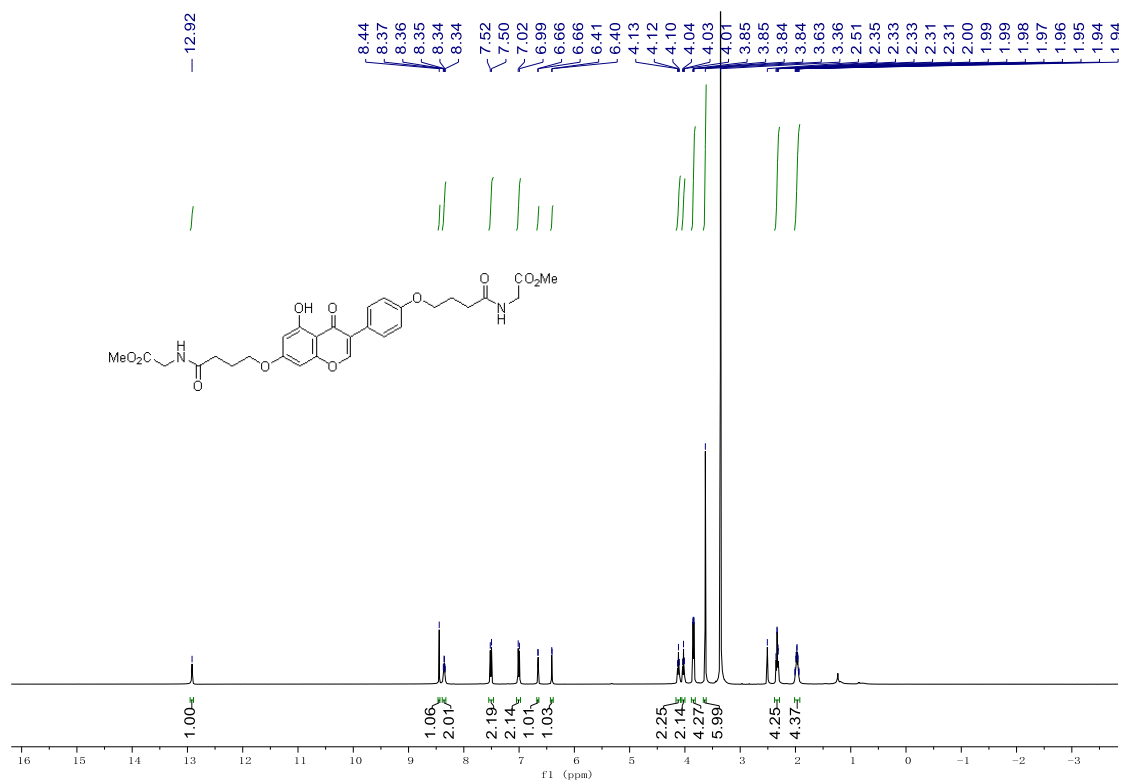

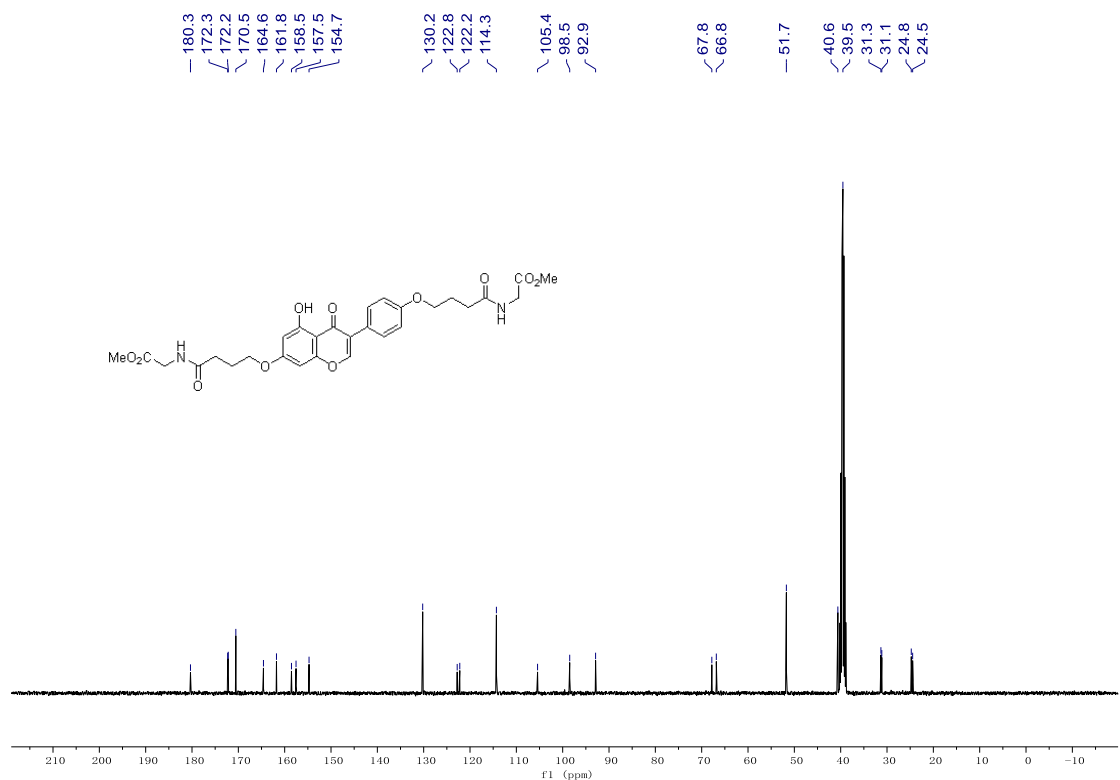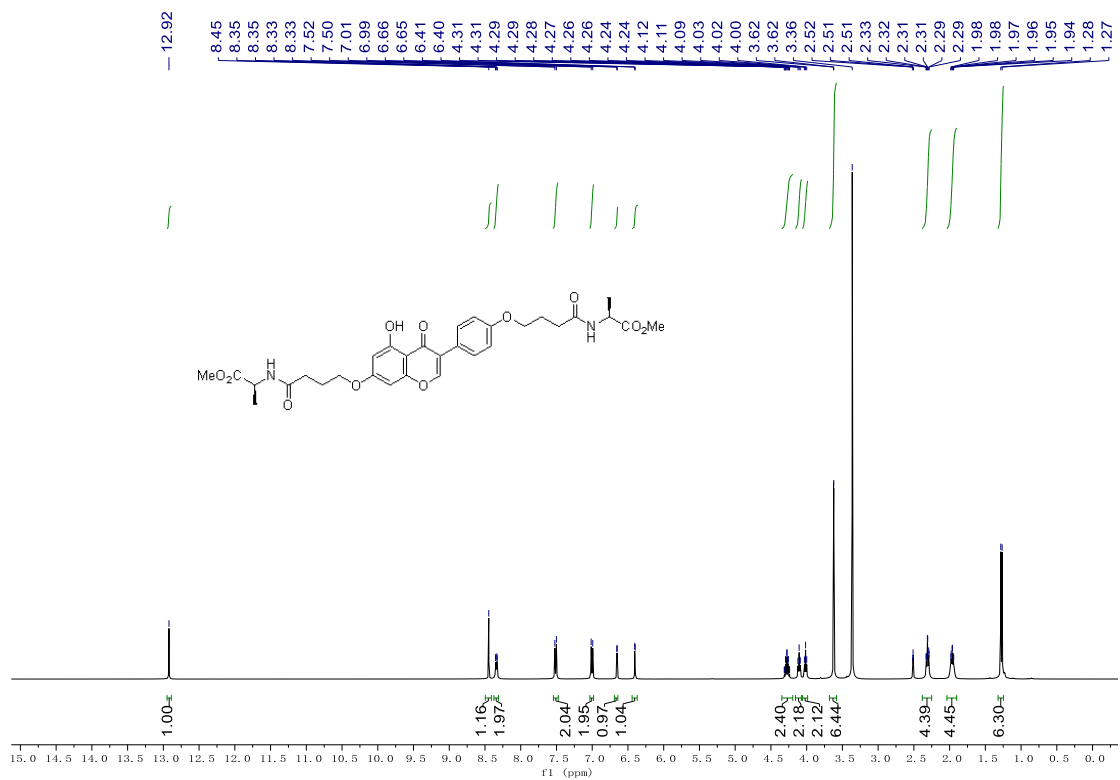

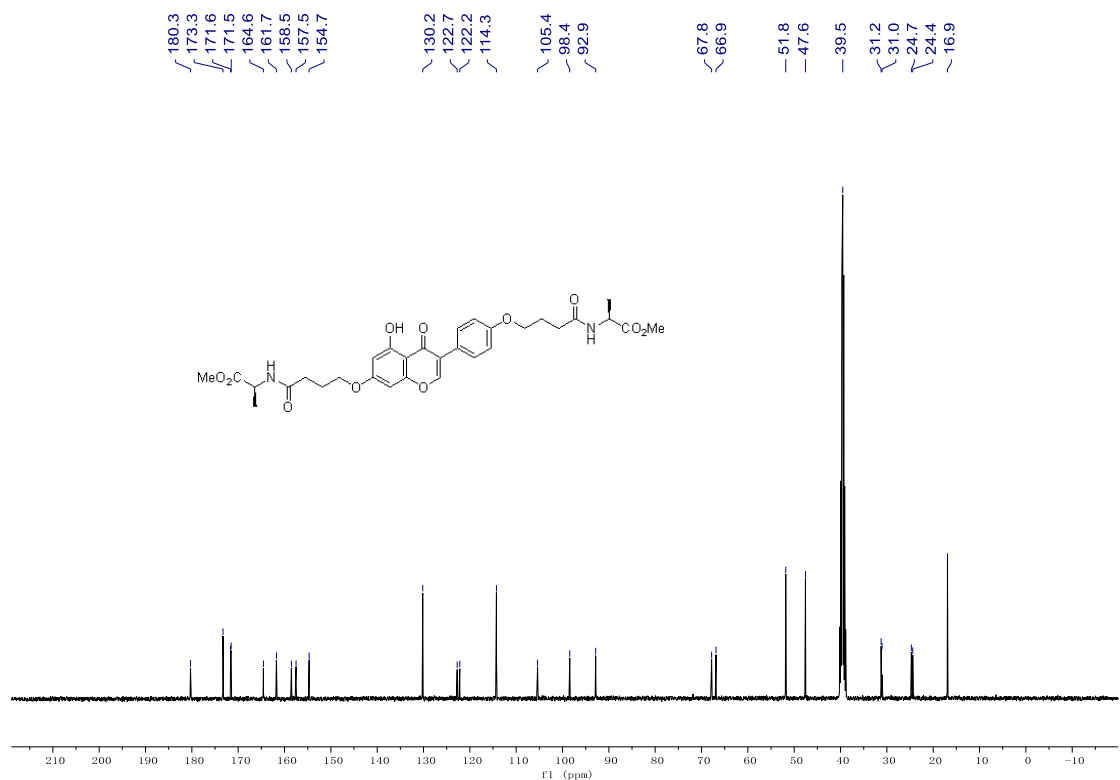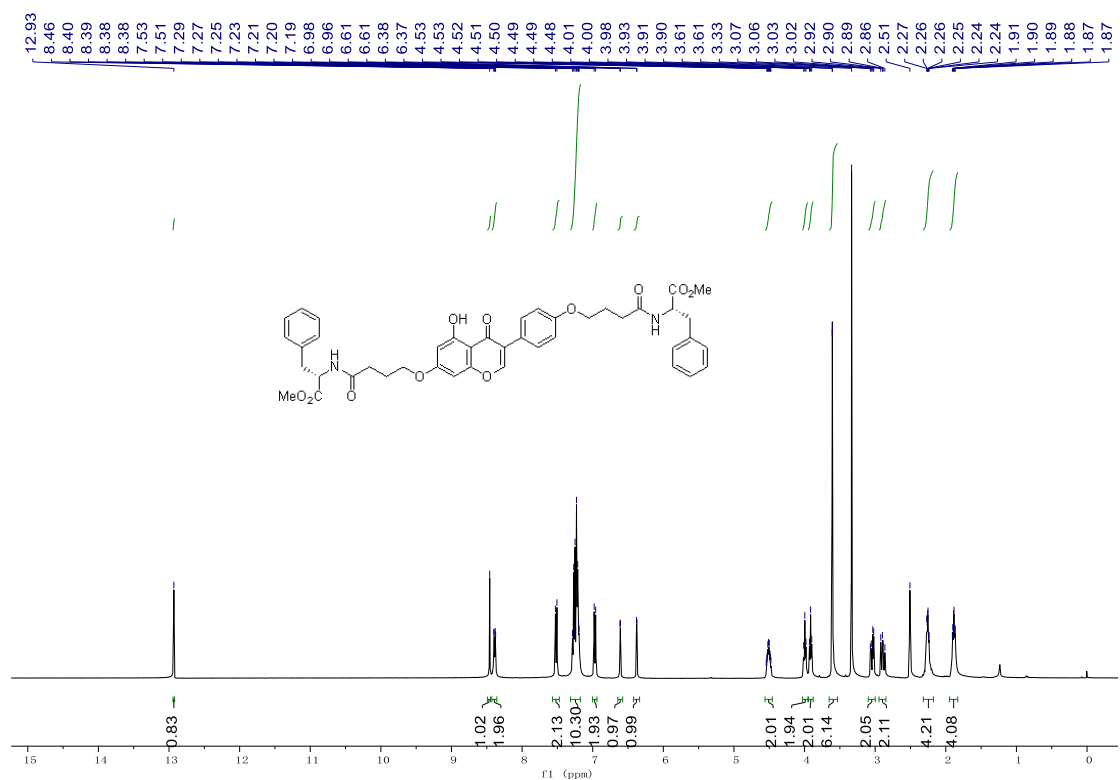

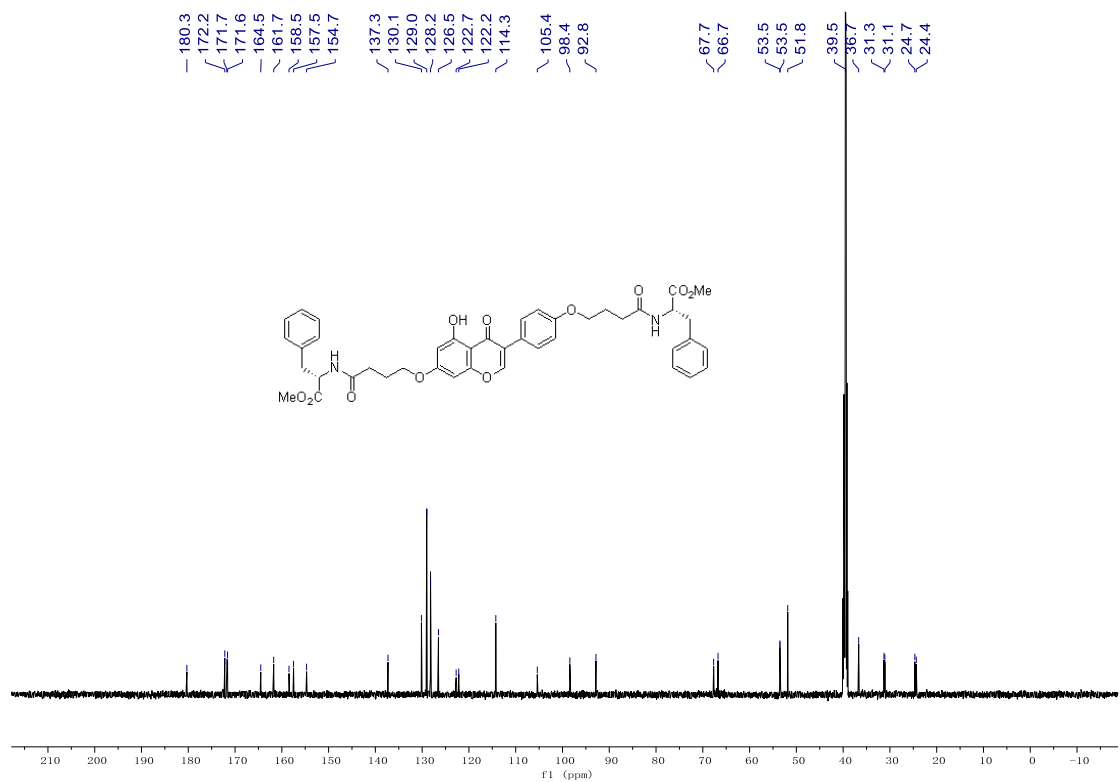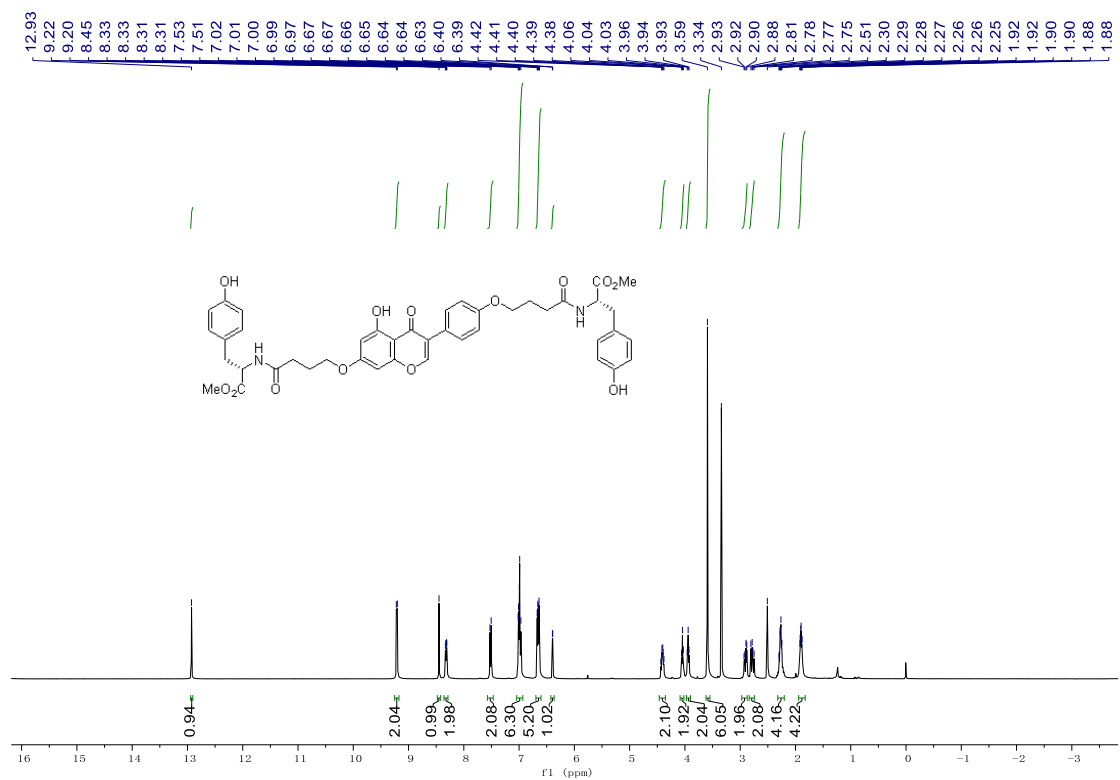

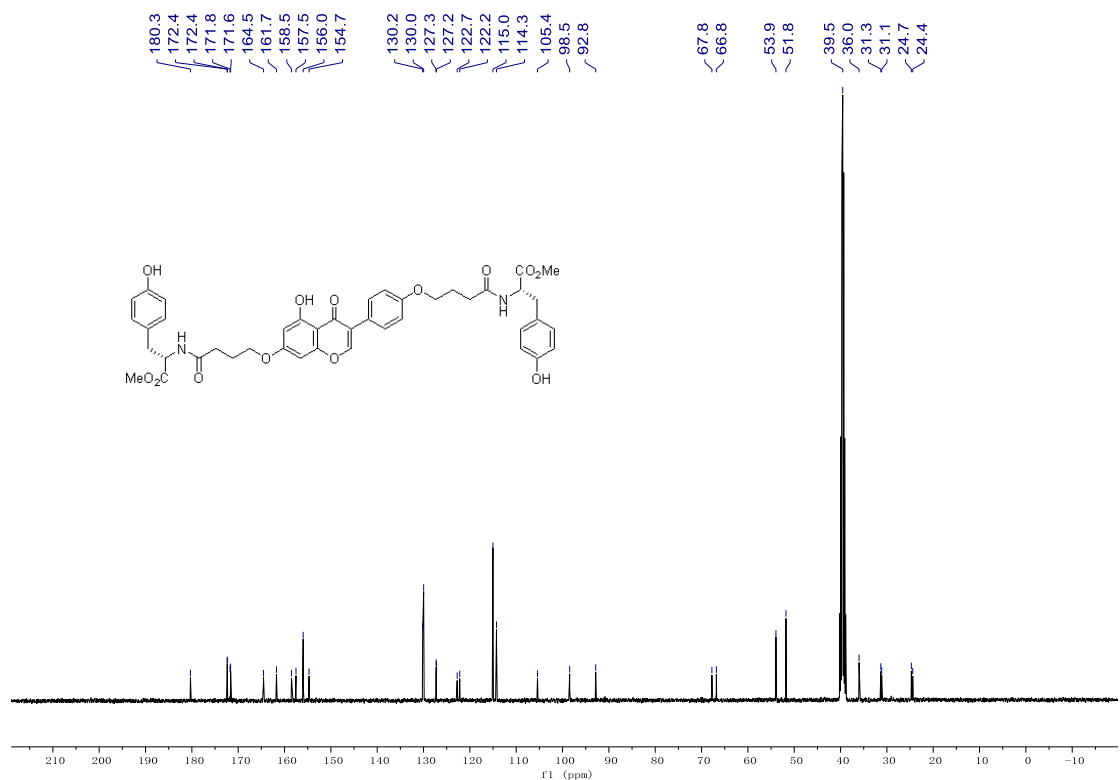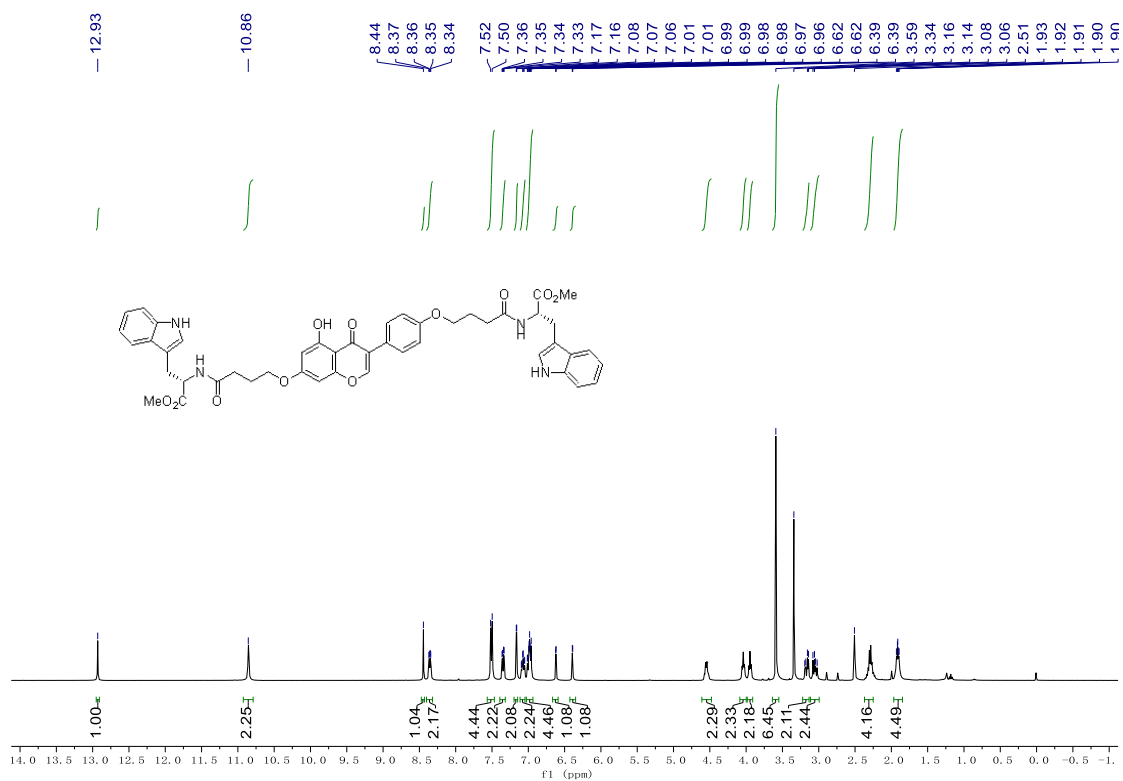

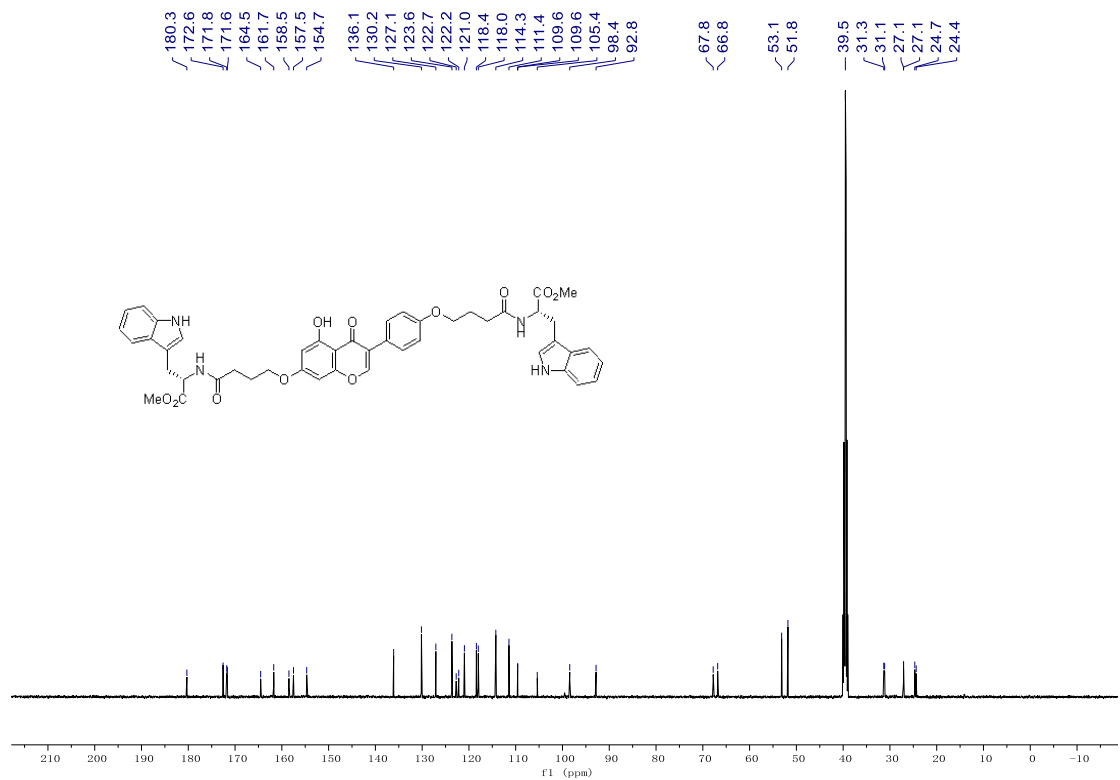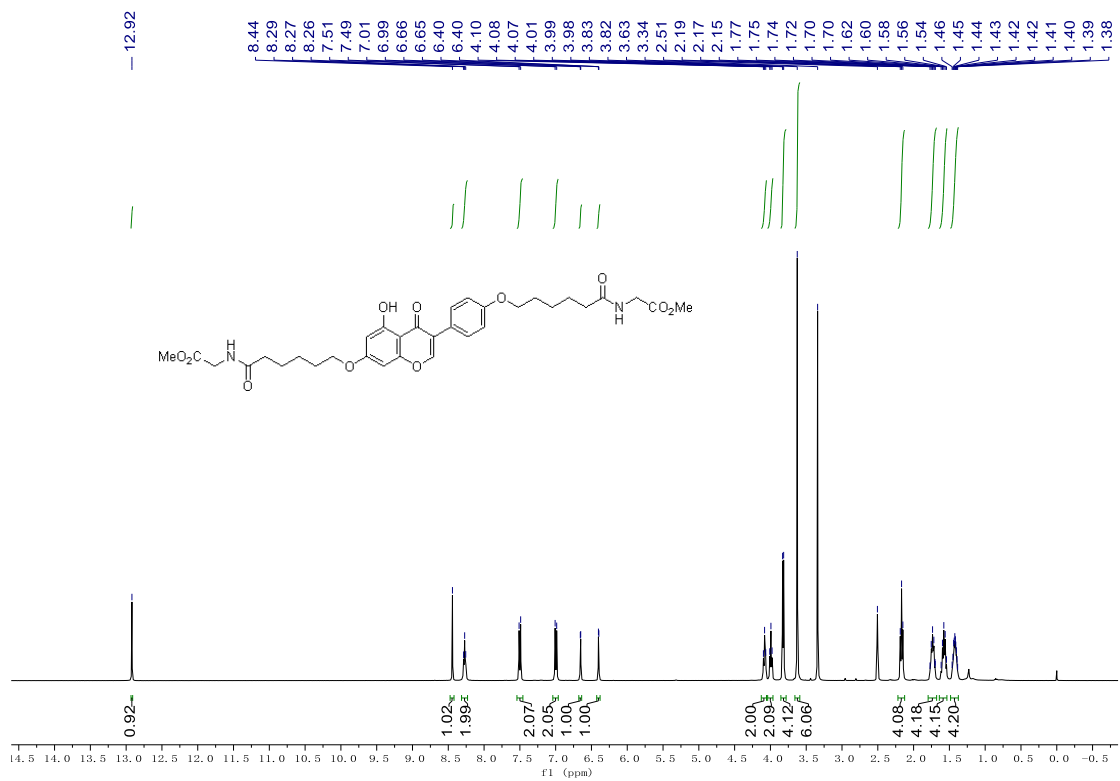

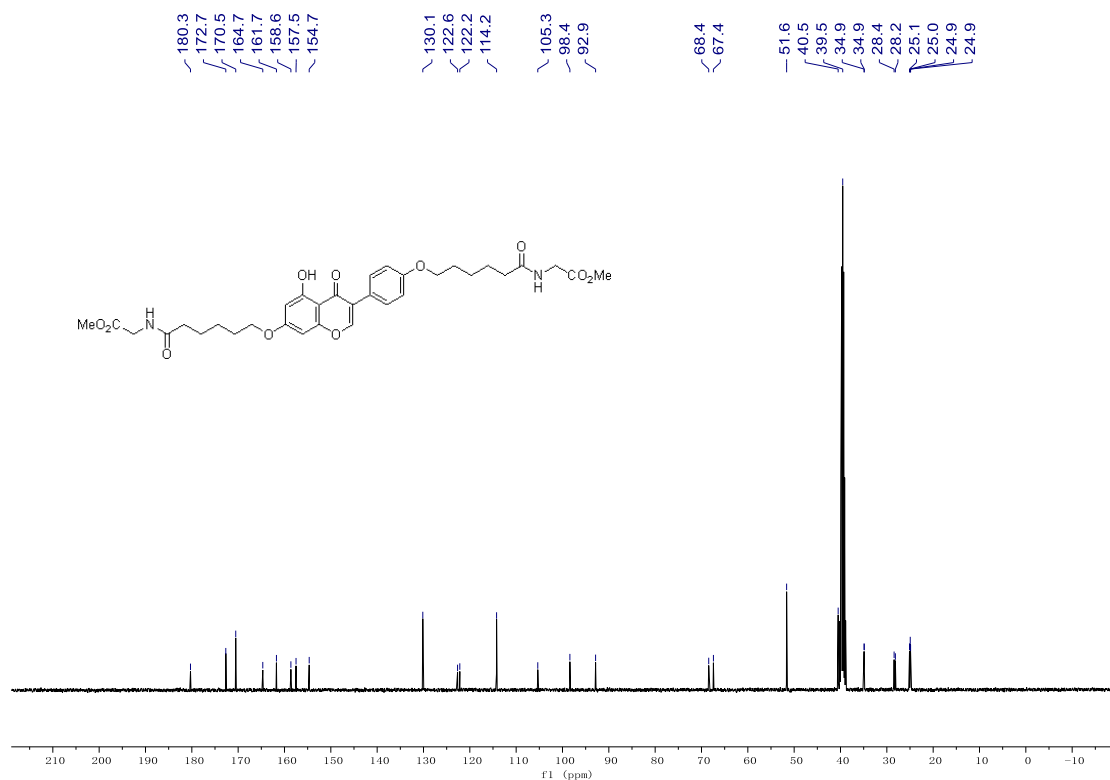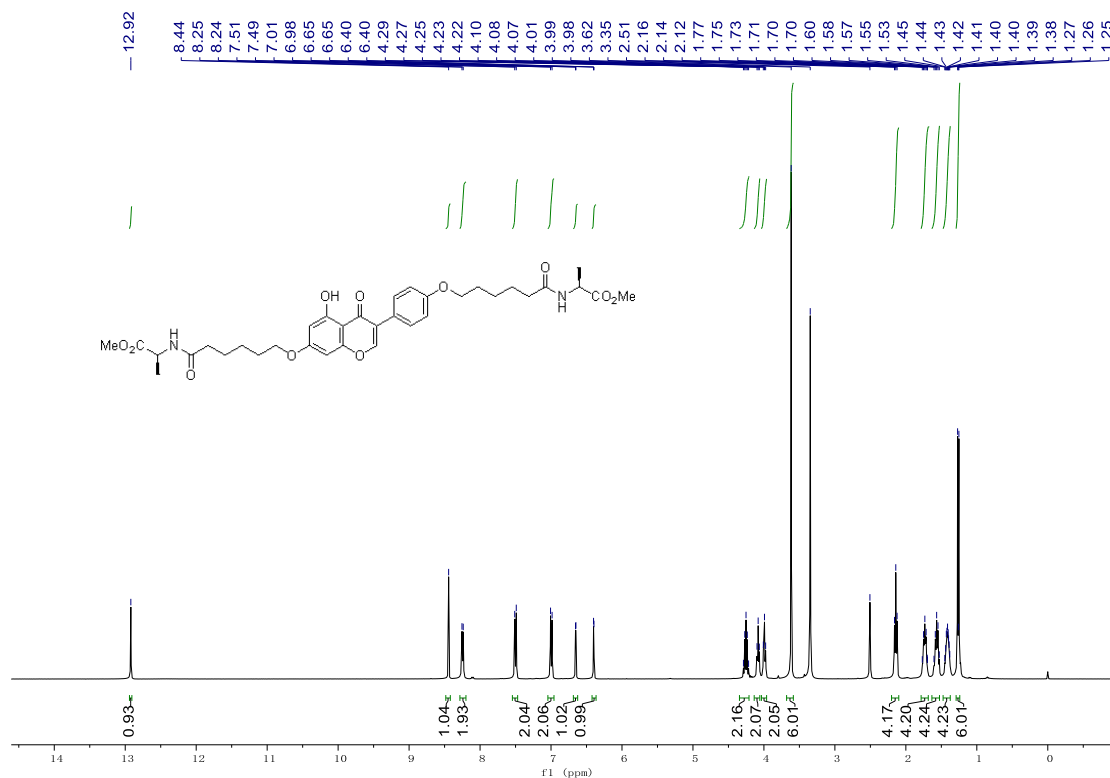

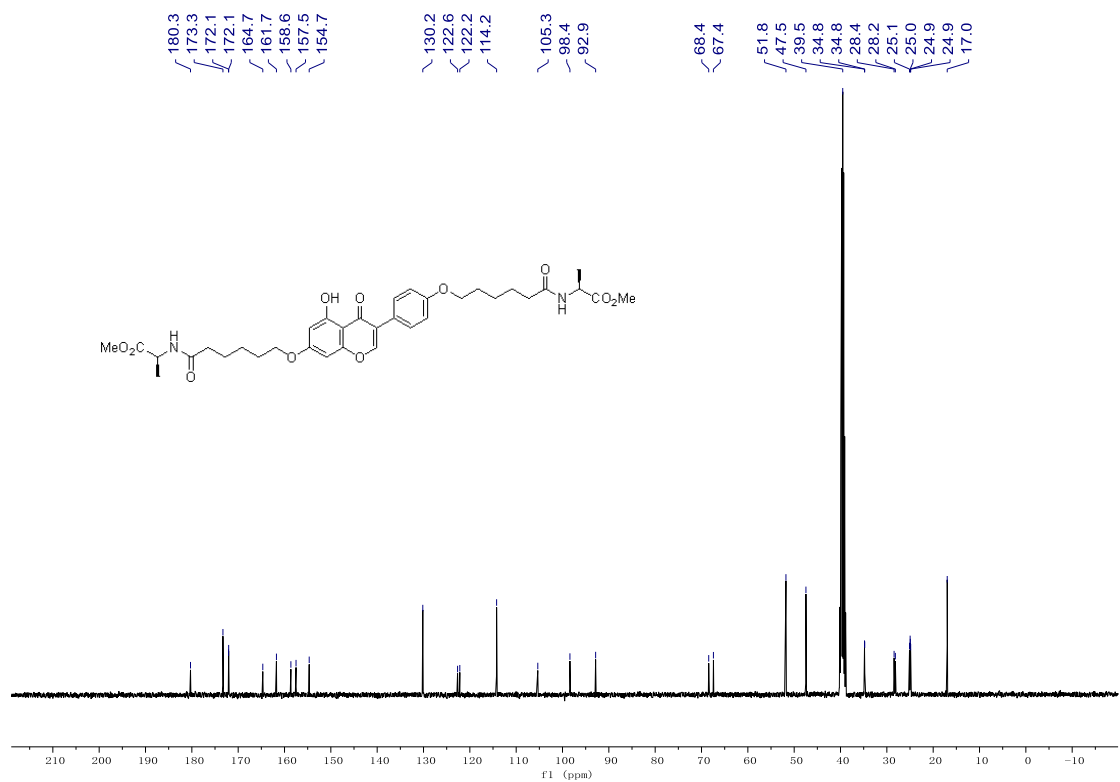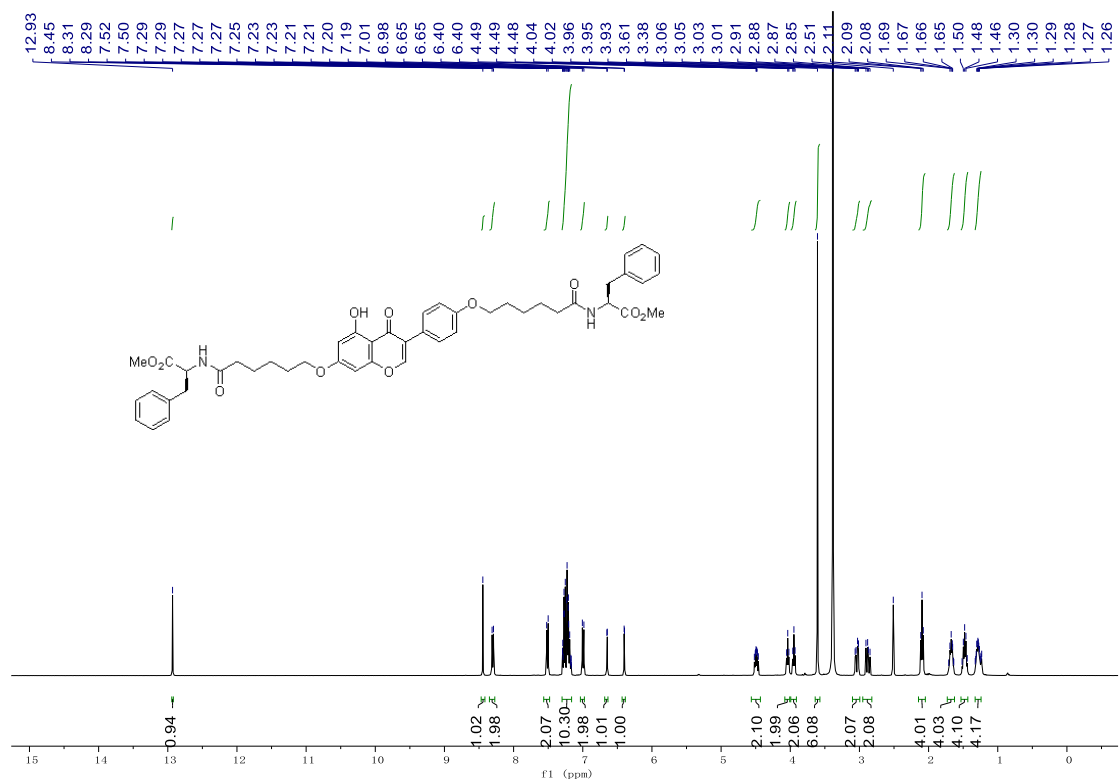



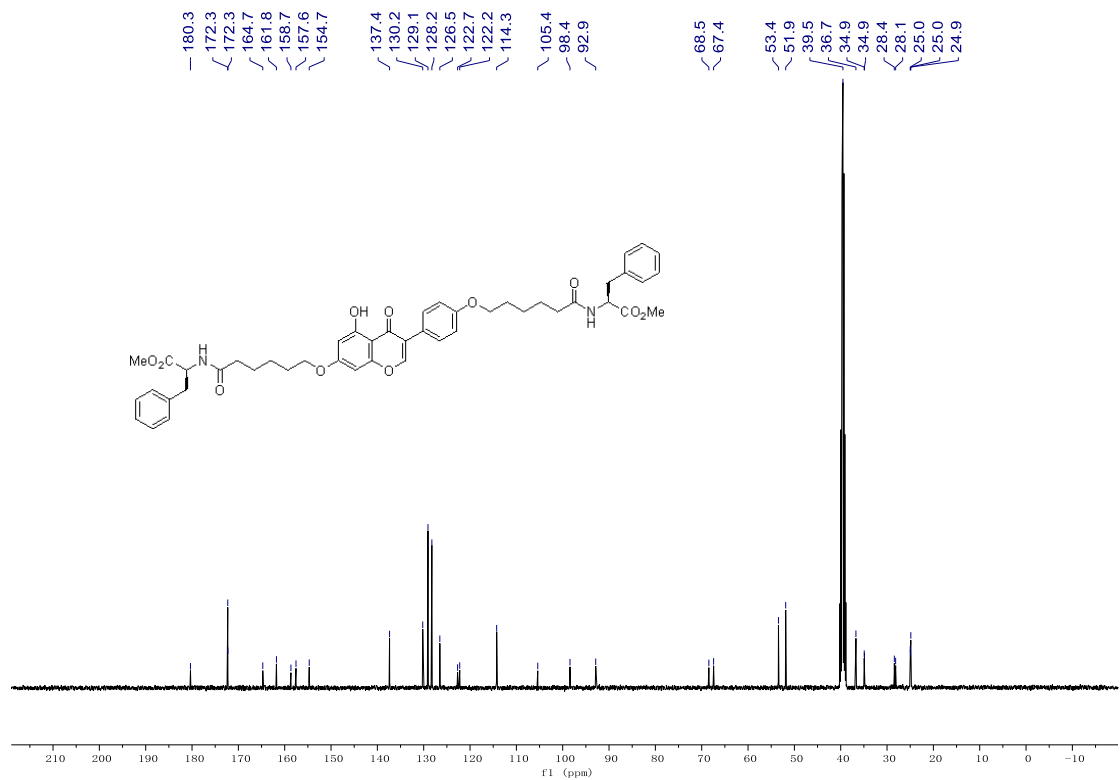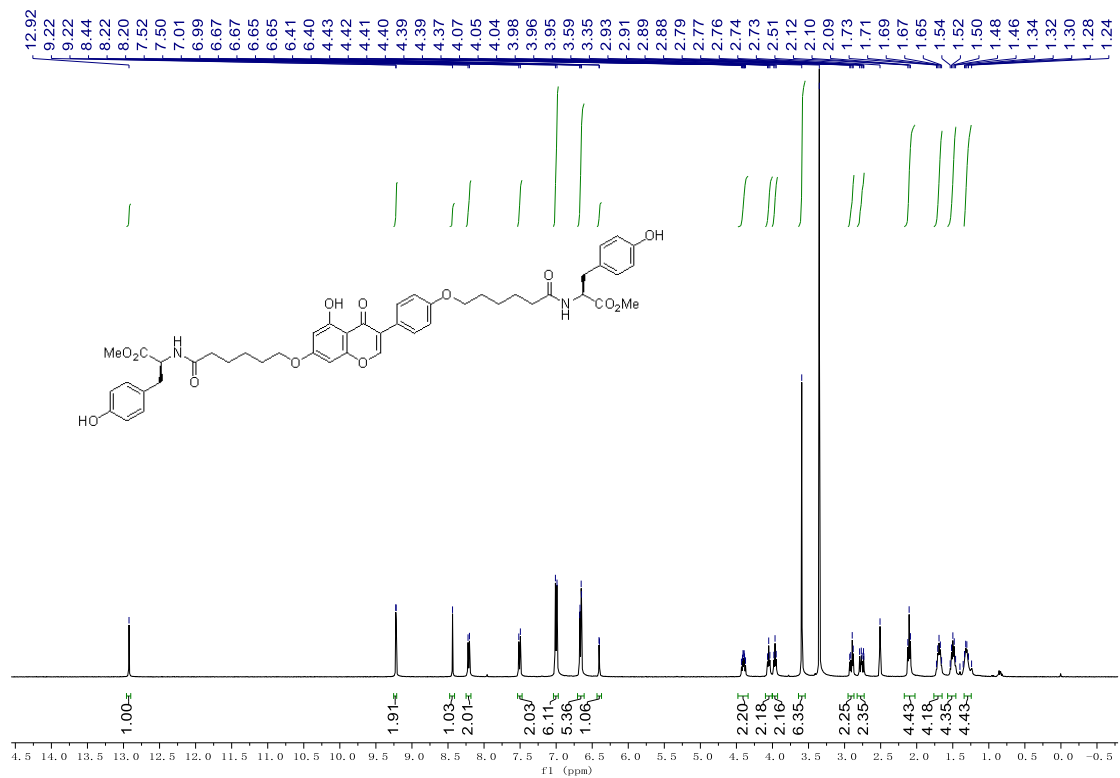

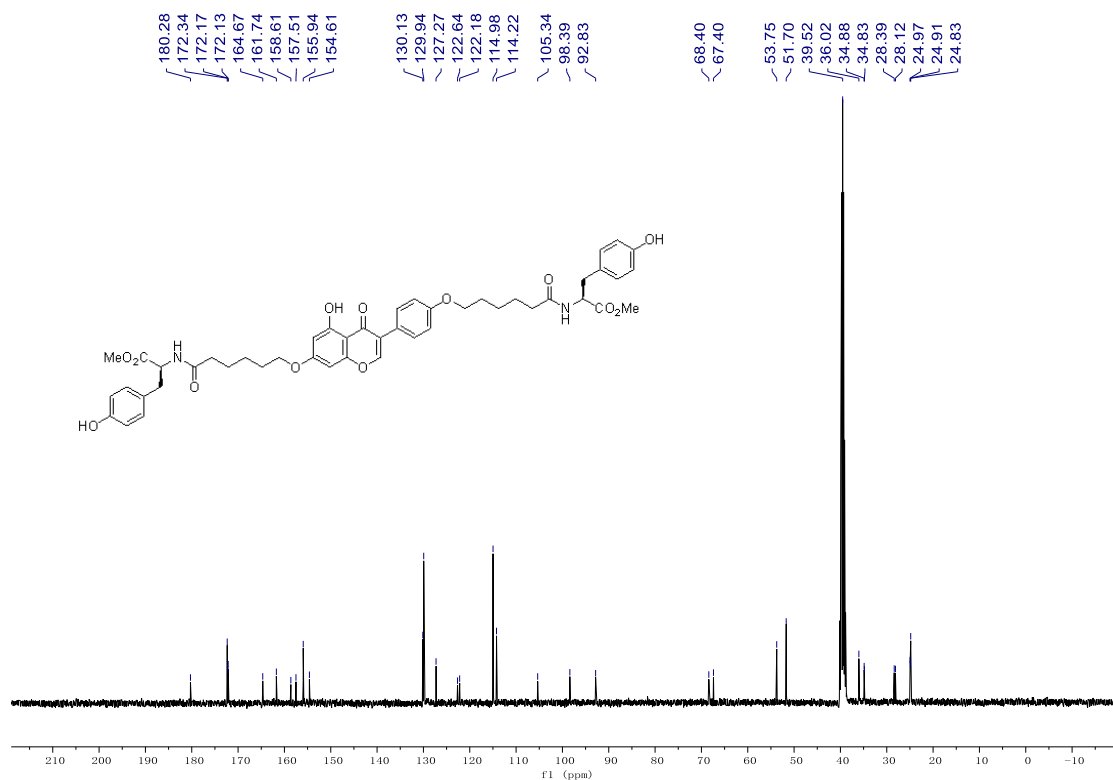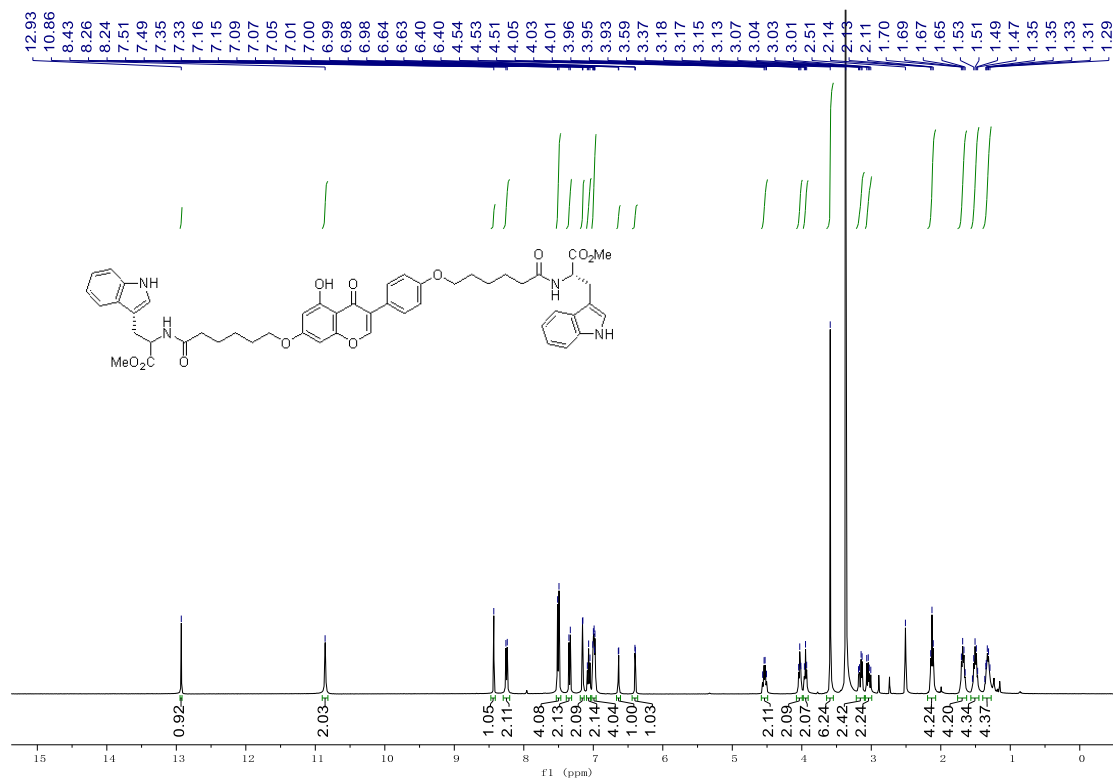

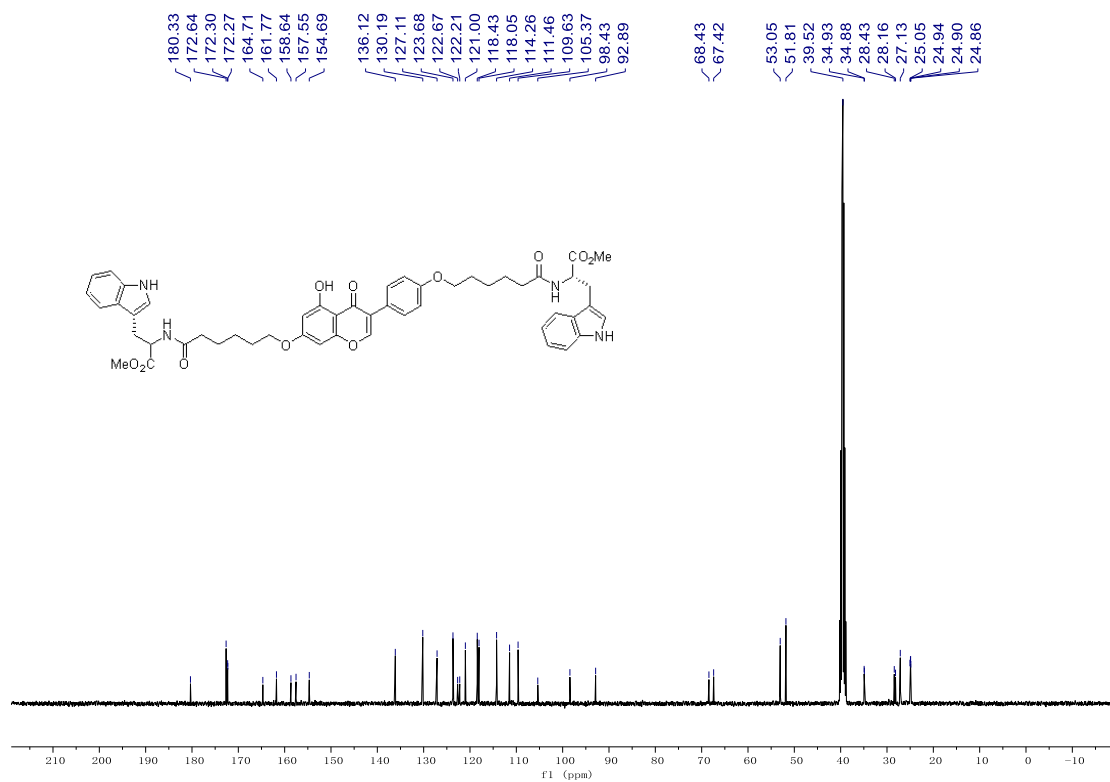

Supplement: Supplementary file 1 [file 17448206]
